# Supplementary material for: Effectiveness of Case Management for 'At Risk' Patients in Primary Care: A Systematic Review and Meta-Analysis
Source: PLoS One. 2015 Jul 17;10(7):e0132340. doi: 10.1371/journal.pone.0132340 (PMC4505905; doi:10.1371/journal.pone.0132340)
Supplement: S3 Appendix — (DOCX) [file pone.0132340.s003.docx]

# S1 Appendix:

# Results of the sensitivity analysis excluding studies at high risk of bias*

*** No significant results remain following Holm-Bonferroni correction for multiple comparisons**

## Primary analysis – sensitivity analysis

## Secondary analysis – sensitivity analysis

| **Outcome (time-period)** | **Subgroup effect size (number of studies)** | |
| --- | --- | --- |
|  | **MDT (19)** | **Single (15)** |
| Utilisation primary care (short) | -0.09 (-0.31 to 0.14) **(10)** | -0.04 (-0.20 to 0.11) **(4)** |
| Utilisation secondary care (short) | 0.10 (0.01 to 0.20)* **(13)** | 0.01 (-0.06 to 0.09) **(8)** |
|  | **Low PHC score (22)** | **Int/high PHC score (12)** |
| Utilisation primary care (short) | -0.14 (-0.33 to 0.05) **(10)** | 0.05 (-0.14 to 0.25) **(4)** |
| Utilisation secondary care (short) | 0.01 (-0.03 to 0.06) **(15)** | 0.13 (-0.05 to 0.31) **(6)** |
|  | **Clinical Judgement (4)** | **Risk modelling (30)** |
| Utilisation primary care (short) | n/a | n/a |
| Utilisation secondary care (short) | -0.06 (-0.18 to 0.06) **(3)** | 0.07 (0.01 to 0.14)* **(18)** |
|  | **RCT (26)** | **Non-RCT (8)** |
| Utilisation primary care (short) | n/a | n/a |
| Utilisation secondary care (short) | 0.04 (-0.02 to 0.10) **(17)** | 0.17 (-0.11 to 0.45) **(4)** |
|  | **Social worker (11)** | **No social worker (23)** |
| Utilisation primary care (short) | -0.15 (-0.42 to 0.12) **(9)** | 0.04 (-0.03 to 0.11) **(5)** |
| Utilisation secondary care (short) | 0.11 (0.01 to 0.22)* **(9)** | 0.03 (-0.04 to 0.10) **(12)** |

No significant difference between subgroups (p<0.05)

* = significant in-subgroup effect (p<0.05)

*Note*: Positive effect size favours case management for all measures

# Results of the sensitivity analysis excluding studies conducted in Veteran’s settings (over 90% male population)*

*** No significant results remain following Holm-Bonferroni correction for multiple comparisons**

## Primary analysis – sensitivity analysis

## Secondary analysis – sensitivity analysis

| **Outcome (time-period)** | **Subgroup effect size (number of studies)** | |
| --- | --- | --- |
|  | **MDT (19)** | **Single (12)** |
| Mortality (short) | n/a | n/a |
| Mortality (long) | 0.01 (-0.08 to 0.10) **(4)** | 0.01 (-0.08 to 0.10) **(7)** |
| Self-rated health (short) | 0.13 (-0.03 to 0.29) **(6)** | 0.00 (-0.05 to 0.06) **(4)** |
| Utilisation primary care (short) | 0.01 (-0.14 to 0.15) **(10)** | -0.09 (-0.30 to 0.12) **(3)** |
| Utilisation secondary care (short) | 0.08 (-0.03 to 0.19) **(13)** | 0.03 (-0.10 to 0.15) **(5)** |
| Utilisation secondary care (long) | 0.02 (-0.06 to 0.09) **(7)** | -0.10 (-0.22 to 0.0) **(6)** |
|  | **Low PHC score (18)** | **Int/high PHC score (13)** |
| Mortality (short) | n/a | n/a |
| Mortality (long) | 0.04 (-0.02 to 0.11) **(8)** | -0.10 (-0.27 to 0.08) **(3)** |
| Self-rated health (short) | 0.12 (-0.05 to 0.29) **(4)** | 0.03 (-0.08 to 0.13) **(6)** |
| Utilisation primary care (short) | -0.04 (-0.19 to 0.11) **(8)** | -0.00 (-0.20 to 0.20) **(5)** |
| Utilisation secondary care (short) | 0.03 (-0.05 to 0.10) **(11)** | 0.08 (-0.10 to 0.26) **(7)** |
| Utilisation secondary care (long) | -0.05 (-0.15 to 0.05) **(8)** | -0.02 (-0.12 to 0.07) **(5)** |
|  | **Clinical Judgement (4)** | **Risk modelling (27)** |
| Mortality (short) | n/a | n/a |
| Mortality (long) | -0.02 (-0.30 to 0.26) **(2)** | 0.01 (-0.06 to 0.08) **(9)** |
| Self-rated health (short) | n/a | n/a |
| Utilisation primary care (short) | n/a | n/a |
| Utilisation secondary care (short) | -0.06 (-0.18 to 0.06) **(3)** | 0.09 (-0.00 to 0.18) **(15)** |
| Utilisation secondary care (long) | -0.01 (-0.15 to 0.14) **(3)** | -0.04 (-0.13 to 0.04) **(10)** |
|  | **RCT (23)** | **Non-RCT (8)** |
| Mortality (short) | n/a | n/a |
| Mortality (long) | 0.01 (-0.06 to 0.08) **(8)** | -0.00 (-0.18 to 0.17) **(3)** |
| Self-rated health (short) | n/a | n/a |
| Utilisation primary care (short) | n/a | n/a |
| Utilisation secondary care (short) | 0.05 (-0.04 to 0.13) **(14)** | 0.17 (-0.11 to 0.45) **(4)** |
| Utilisation secondary care (long) | -0.02 (-0.10 to 0.07) **(9)** | -0.08 (-0.19 to 0.02) **(4)** |
|  | **Social worker (10)** | **No social worker (21)** |
| Mortality (short) | n/a | n/a |
| Mortality (long) | 0.03 (-0.07 to 0.13) **(2)** | -0.00 (-0.09 to 0.08) **(9)** |
| Self-rated health (short) | 0.14 (-0.02 to 0.30) **(4)** | 0.02 (-0.07 to 0.10) **(6)** |
| Utilisation primary care (short) | -0.02 (-0.23 to 0.18) **(8)** | 0.01 (-0.09 to 0.11) **(5)** |
| Utilisation secondary care (short) | 0.11 (-0.01 to 0.22) **(8)** | 0.03 (-0.07 to 0.13) **(10)** |
| Utilisation secondary care (long) | -0.12 (-0.43 to 0.19) **(2)** | -0.02 (-0.10 to 0.05) **(11)** |

No significant difference between subgroups (p<0.05)

* = significant in-subgroup effect (p<0.05)

*Note*: Positive effect size favours case management for all measures
